# Supplementary material
Source: PubMed Central journal article supplement (PMC3098132)
Supplement: NIHMS287480-supplement-1_si_001.pdf [file NIHMS287480-supplement-1_si_001.pdf]

## Supporting Information

### **Temperature Dependence of the Kinetic Isotope Effects in Thymidylate Synthase. A Theoretical Study**

Natalia Kanaan,<sup>1</sup> Silvia Ferrer,<sup>1</sup> Sergio Martí,<sup>1,\*</sup> Mireia Garcia-Viloca,<sup>2</sup> Amnon Kohen<sup>3</sup>

and

Vicent Moliner<sup>1,4,\*</sup>

<sup>1</sup>*Departament de Química Física i Analítica, Universitat Jaume I, 12071 Castellón, Spain.*

<sup>2</sup>*Departament de Química, Universitat Autònoma de Barcelona, 08193 Bellaterra, Barcelona, Spain*

<sup>3</sup>*Department of Chemistry, University of Iowa, Iowa City, IA 52242, USA*

<sup>4</sup>*Institute of Applied Radiation Chemistry, Technical University of Lodz, 90-924 Lodz, Poland.*

\*To whom correspondence should be addressed:

S. Martí; [smarti@uji.es](mailto:smarti@uji.es). Phone: (+34) 964-728071. Fax: (+34) 964-728066

V. Moliner; [moliner@uji.es](mailto:moliner@uji.es). Phone: (+34) 964-728084. Fax: (+34) 964-728066

Table S1. Averaged distances corresponding to interactions between the substrate and protein at 278 K.

| T= 278 K         | Reactants   | TS          | Products    |
|------------------|-------------|-------------|-------------|
| S-Wat            | 11.0 ± 0.5  | 11.1 ± 0.7  | 11.4 ± 0.5  |
| O2(dUMP)-Asp169  | 2.00 ± 0.13 | 2.03 ± 0.15 | 2.00 ± 0.14 |
| P(dUMP)-Arg166   | 2.50 ± 0.12 | 2.49 ± 0.11 | 2.60 ± 0.13 |
| O1(dUMP)-Arg126' | 4.1 ± 0.3   | 4.1 ± 0.3   | 4.1 ± 0.3   |
| O1(dUMP)-Arg21   | 3.17 ± 0.21 | 3.14 ± 0.20 | 3.14 ± 0.18 |
| O2(dUMP)-Arg126' | 2.49 ± 0.17 | 2.49 ± 0.19 | 2.52 ± 0.17 |
| O4(dUMP)-Arg166  | 1.85 ± 0.19 | 1.95 ± 0.25 | 1.90 ± 0.17 |
| O4(dUMP)-Arg166  | 2.5 ± 0.3   | 2.3 ± 0.4   | 2.9 ± 0.4   |
| O3(dUMP)-Arg166  | 3.6 ± 0.3   | 3.6 ± 0.4   | 4.4 ± 0.5   |
| O3(dUMP)-Arg166  | 2.34 ± 0.24 | 2.2 ± 0.3   | 2.49 ± 0.23 |
| O3(dUMP)-Arg127' | 3.85 ± 0.10 | 3.78 ± 0.12 | 3.80 ± 0.12 |

Table S2. Averaged distances corresponding to interactions between the substrate and protein at 293 K.

| T= 293 K         | Reactants   | TS          | Products    |
|------------------|-------------|-------------|-------------|
| S-Wat            | 4.5 ± 0.8   | 3.2 ± 0.8   | 2.31 ± 0.16 |
| O2(dUMP)-Asp169  | 2.13 ± 0.19 | 2.10 ± 0.17 | 2.09 ± 0.18 |
| P(dUMP)-Arg166   | 2.51 ± 0.13 | 2.49 ± 0.12 | 2.52 ± 0.13 |
| O1(dUMP)-Arg126' | 3.86 ± 0.25 | 3.86 ± 0.25 | 4.1 ± 0.4   |
| O1(dUMP)-Arg21   | 3.15 ± 0.19 | 3.24 ± 0.20 | 3.5 ± 0.5   |
| O2(dUMP)-Arg126' | 2.71 ± 0.20 | 2.62 ± 0.20 | 2.73 ± 0.18 |
| O4(dUMP)-Arg166  | 2.2 ± 0.3   | 2.0 ± 0.3   | 1.87 ± 0.20 |
| O4(dUMP)-Arg166  | 1.88 ± 0.21 | 2.2 ± 0.4   | 2.3 ± 0.3   |
| O3(dUMP)-Arg166  | 3.4 ± 0.3   | 3.7 ± 0.4   | 3.7 ± 0.4   |
| O3(dUMP)-Arg166  | 2.05 ± 0.25 | 2.2 ± 0.3   | 2.4 ± 0.3   |
| O3(dUMP)-Arg127' | 3.82 ± 0.13 | 3.79 ± 0.15 | 3.72 ± 0.18 |

Table S3. Averaged distances corresponding to interactions between the substrate and protein at 303 K.

| T= 303 K         | Reactants       | TS              | Products        |
|------------------|-----------------|-----------------|-----------------|
| S-Wat            | $3.25 \pm 0.7$  | $3.3 \pm 0.7$   | $2.9 \pm 0.4$   |
| O2(dUMP)-Asp169  | $2.07 \pm 0.15$ | $2.08 \pm 0.15$ | $2.56 \pm 0.15$ |
| P(dUMP)-Arg166   | $2.50 \pm 0.12$ | $2.50 \pm 0.13$ | $4.60 \pm 0.24$ |
| O1(dUMP)-Arg126' | $4.62 \pm 0.22$ | $4.56 \pm 0.24$ | $3.74 \pm 0.24$ |
| O1(dUMP)-Arg21   | $4.0 \pm 0.3$   | $3.9 \pm 0.4$   | $2.62 \pm 0.21$ |
| O2(dUMP)-Arg126' | $2.70 \pm 0.18$ | $2.64 \pm 0.18$ | $3.74 \pm 0.24$ |
| O4(dUMP)-Arg166  | $2.2 \pm 0.3$   | $2.10 \pm 0.24$ | $2.1 \pm 0.3$   |
| O4(dUMP)-Arg166  | $2.4 \pm 0.3$   | $2.4 \pm 0.3$   | $2.6 \pm 0.4$   |
| O3(dUMP)-Arg166  | $3.2 \pm 0.3$   | $3.24 \pm 0.23$ | $3.0 \pm 0.3$   |
| O3(dUMP)-Arg166  | $2.05 \pm 0.24$ | $2.11 \pm 0.24$ | $2.2 \pm 0.3$   |
| O3(dUMP)-Arg127' | $4.08 \pm 0.11$ | $4.08 \pm 0.12$ | $4.2 \pm 0.24$  |

Table S4. Averaged distances corresponding to interactions between the substrate and protein at 313 K.

| T= 313 K         | Reactants       | TS              | Products        |
|------------------|-----------------|-----------------|-----------------|
| S-Wat            | $3.8 \pm 0.8$   | $3.3 \pm 0.7$   | $3.1 \pm 0.6$   |
| O2(dUMP)-Asp169  | $2.09 \pm 0.17$ | $2.08 \pm 0.18$ | $1.98 \pm 0.15$ |
| P(dUMP)-Arg166   | $2.53 \pm 0.13$ | $2.54 \pm 0.14$ | $2.65 \pm 0.18$ |
| O1(dUMP)-Arg126' | $4.7 \pm 0.4$   | $4.8 \pm 0.4$   | $5.0 \pm 0.3$   |
| O1(dUMP)-Arg21   | $3.5 \pm 0.4$   | $3.56 \pm 0.25$ | $3.6 \pm 0.3$   |
| O2(dUMP)-Arg126' | $2.82 \pm 0.25$ | $2.72 \pm 0.20$ | $2.78 \pm 0.21$ |
| O4(dUMP)-Arg166  | $1.89 \pm 0.20$ | $1.97 \pm 0.21$ | $2.0 \pm 0.3$   |
| O4(dUMP)-Arg166  | $2.3 \pm 0.4$   | $2.5 \pm 0.3$   | $2.7 \pm 0.4$   |
| O3(dUMP)-Arg166  | $3.4 \pm 0.3$   | $3.22 \pm 0.25$ | $3.3 \pm 0.3$   |
| O3(dUMP)-Arg166  | $2.34 \pm 0.25$ | $2.3 \pm 0.3$   | $2.5 \pm 0.3$   |
| O3(dUMP)-Arg127' | $4.07 \pm 0.14$ | $4.11 \pm 0.16$ | $4.21 \pm 0.25$ |

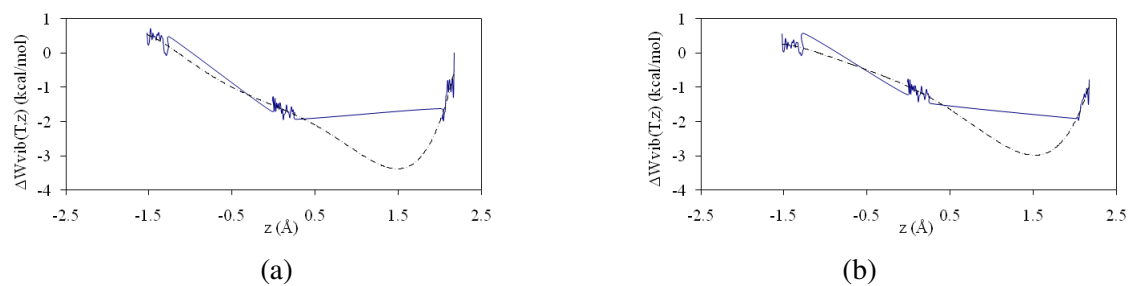

Figure S1. Quantum vibrational free energy correction for protium (a) and tritium (b) computed at 278 K.

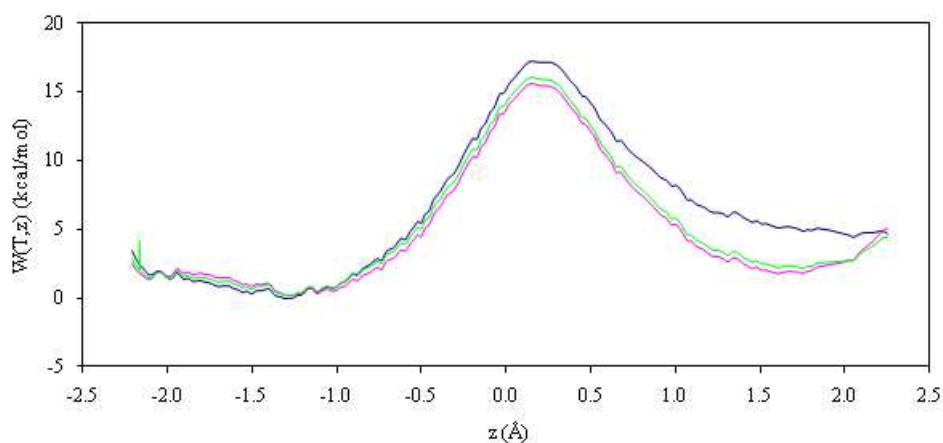

Figure S2. Classical mechanical PMF for hydride transfer (blue line), quasiclassical PMF including quantum vibrational free energy correction for protium (magenta line) and tritium (green line). Results obtained at 278 K.

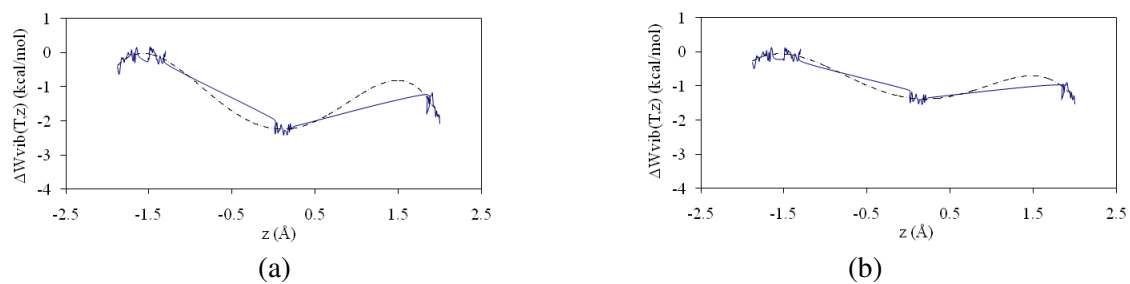

Figure S3. Quantum vibrational free energy correction for protium (a) and tritium (b) computed at 303 K.

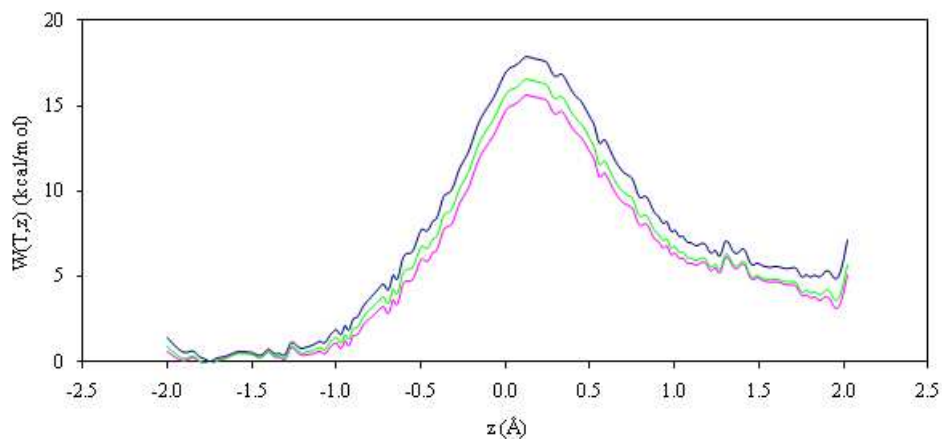

Figure S4. Classical mechanical PMF for hydride transfer (blue line), quasiclassical PMF including quantum vibrational free energy correction for protium (magenta line) and tritium (green line). Results obtained at 303 K.

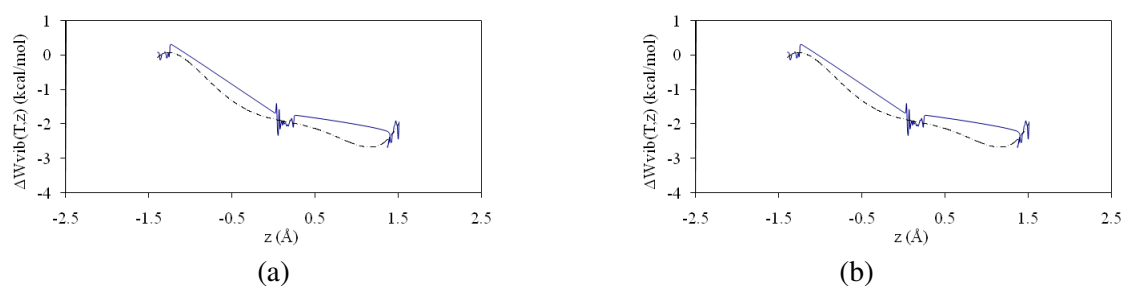

Figure S5. Quantum vibrational free energy correction for protium (a) and tritium (b) computed at 313 K.

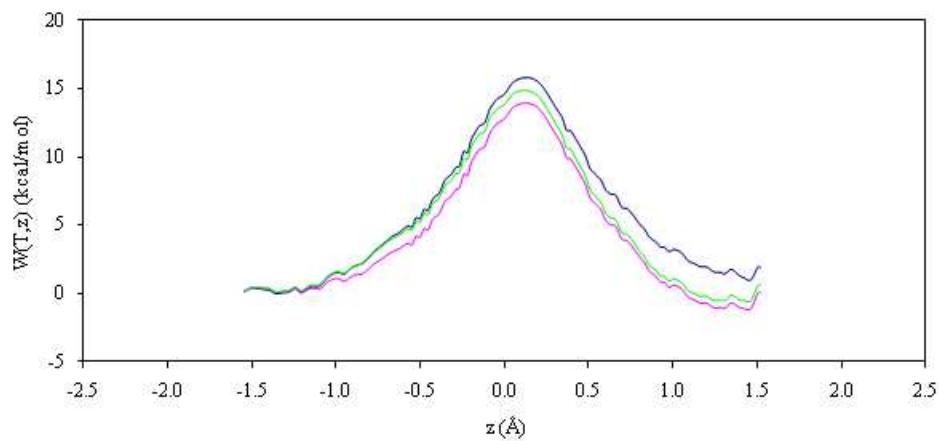

Figure S6. Classical mechanical PMF for hydride transfer (blue line), quasiclassical PMF including quantum vibrational free energy correction for protium (magenta line) and tritium (green line). Results obtained at 313 K.

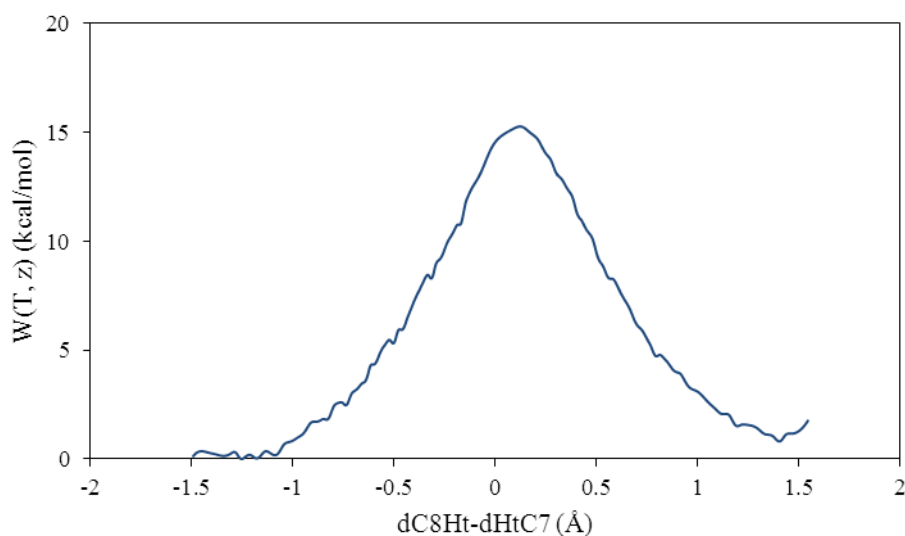

S7. Classical mechanical PMF obtained at 303 K using as the initial structures those previously employed to get the classical mechanical PMF at 313 K.

Complete reference 50:

MacKerell, A. D.; Bashford, D.; Bellott, M.; Dunbrack, R. L.; Evanseck, J. D.; Field, M. J.; Fischer, S.; Gao, J.; Guo, H.; Ha, S.; Joseph-McCarthy, D.; Kuchnir, L.; Kuczera, K.; Lau, F. T. K.; Mattos, C.; Michnick, S.; Ngo, T.; Nguyen, D. T.; Prodhom, B.; Reiher, W. E.; Roux, B.; Schlenkrich, M.; Smith, J. C.; Stote, R.; Straub, J.; Watanabe, M.; Wiorkiewicz-Kuczera, J.; Yin, D.; Karplus, M. *Journal of Physical Chemistry B* **1998**, *102*, 3586.
